# Supplementary material for: Detecting dominant changes in irregularly sampled multivariate water quality data sets
Source: Copernicus journal article supplement (doi:10.5194/hess-22-4401-2018), 2018-08-21
Supplement: Supplementary file 1 [file hess-22-4401-2018-supplement.pdf]

Supplement of Hydrol. Earth Syst. Sci., 22, 4401–4424, 2018  
<https://doi.org/10.5194/hess-22-4401-2018-supplement>  
© Author(s) 2018. This work is distributed under  
the Creative Commons Attribution 4.0 License.

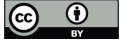

*Supplement of*

## **Detecting dominant changes in irregularly sampled multivariate water quality data sets**

**Christian Lehr et al.**

*Correspondence to:* Christian Lehr (lehr@zalf.de)

The copyright of individual parts of the supplement might differ from the CC BY 4.0 License.

**Table S1.** Stream water sampling sites. The abbreviation in the ID refers to the corresponding catchment. N: number of samples.

| ID     | N   | Easting | Northing | Catchment    |
|--------|-----|---------|----------|--------------|
| D_112  | 126 | 3426969 | 5916330  | Dauergraben  |
| U_128  | 114 | 3423416 | 5907370  | Ucker        |
| St_133 | 124 | 3420262 | 5891835  | Stierngraben |
| S_118  | 118 | 3421173 | 5907839  | Strom        |
| S_120  | 1   | 3418025 | 5906225  | Strom        |
| S_121  | 23  | 3416348 | 5905013  | Strom        |
| S_122  | 1   | 3412048 | 5903419  | Strom        |
| Q_93   | 126 | 3422251 | 5908887  | Quillow      |
| Q_95   | 125 | 3420582 | 5910416  | Quillow      |
| Q_96   | 11  | 3420084 | 5913122  | Quillow      |
| Q_97   | 126 | 3419850 | 5913404  | Quillow      |
| Q_98   | 127 | 3417941 | 5913091  | Quillow      |
| Q_100  | 110 | 3412572 | 5912708  | Quillow      |
| Q_104  | 71  | 3409712 | 5912268  | Quillow      |
| Q_106  | 12  | 3406372 | 5912814  | Quillow      |
| Q_102  | 11  | 3410569 | 5911755  | Quillow      |
| Q_103  | 8   | 3408376 | 5910401  | Quillow      |
| P_107  | 78  | 3410047 | 5912392  | Peege        |
| P_108  | 61  | 3408727 | 5914397  | Peege        |
| P_109  | 8   | 3410232 | 5916180  | Peege        |
| P_110  | 51  | 3410858 | 5917416  | Peege        |

**Table S2.** Sampling sites for groundwater quality and groundwater level. The abbreviation in the ID refers to the corresponding catchment. The subscripts Gs = shallow groundwater and Gd = deep groundwater give additional information on the respective groundwater layer. All groundwater wells are inside the Quillow catchment. N: number of samples.

| ID     | N  | Easting | Northing | Depth of screen<br>m (a.s.l) | Depth of screen<br>m below ground |
|--------|----|---------|----------|------------------------------|-----------------------------------|
| Gd_205 | 2  | 3416412 | 5911941  | 40.55 - 38.55                | 15 - 17                           |
| Gd_204 | 25 | 3412546 | 5912702  | 49 - 47                      | 16 - 18                           |
| Gs_200 | 6  | 3410020 | 5912439  | 74.10 - 73.10                | 4.0 - 5.0                         |
| Gs_199 | 18 | 3409934 | 5912302  | 72.20 - 71.20                | 3.0 - 4.0                         |
| Gd_198 | 28 | 3409934 | 5912302  | 51.27 - 53.27                | 22 - 24                           |
| Gs_202 | 11 | 3409863 | 5912702  | 74.14 - 73.14                | 4.0 - 5.0                         |
| Gd_201 | 25 | 3409863 | 5912702  | 65.79 - 63.79                | 12.5 - 14.5                       |
| Gd_203 | 25 | 3409764 | 5912942  | 63.46 - 61.46                | 16 - 18                           |

**Table S3.** Measurement details of the analysed variables. Before the data analysis  $\text{NH}_4^+$  was calculated from  $\text{NH}_4\text{-N}$ ,  $\text{PO}_4^{3-}$  from  $\text{o-PO}_4\text{-P}$ , and the concentration of  $\text{HCO}_3^-$  was converted from  $\text{mmol L}^{-1}$  to  $\text{mg L}^{-1}$ .

| Abbreviation                        | Parameter                    | Unit                  | Measuring accuracy; detection limit | missing values in % | n samples < detection limit in % |
|-------------------------------------|------------------------------|-----------------------|-------------------------------------|---------------------|----------------------------------|
| <b>Stream water and groundwater</b> |                              |                       |                                     |                     |                                  |
| pH                                  | pH value                     |                       | 0.01                                | 0                   | 0                                |
| Eh                                  | Redox potential              | mV                    | 1                                   | 0.57                | 0                                |
| EC                                  | Electric conductivity        | $\mu\text{S cm}^{-1}$ | 1                                   | 0                   | 0                                |
| Temp                                | Water temperature            | $^\circ\text{C}$      | 0.1                                 | 0                   | 0                                |
| $\text{O}_2$                        | Oxygen                       | $\text{mg L}^{-1}$    | 0.1                                 | 1.91                | 0.25                             |
| $\text{NH}_4\text{-N}$              | Ammonium nitrogen            | $\text{mg L}^{-1}$    | 0.01                                | 0.57                | 0.76                             |
| $\text{o-PO}_4\text{-P}$            | Phosphorus of orthophosphate | $\text{mg L}^{-1}$    | 0.01                                | 0                   | 37.53                            |
| DOC                                 | Dissolved organic carbon     | $\text{mg L}^{-1}$    | 0.05                                | 3.44                | 0                                |
| <b>Anions</b>                       |                              |                       |                                     |                     |                                  |
| $\text{Cl}^-$                       | Chloride                     | $\text{mg L}^{-1}$    | 0.03                                | 0                   | 0                                |
| $\text{NO}_2^-$                     | Nitrite                      | $\text{mg L}^{-1}$    | 0.03                                | 2.54                | 65.52                            |
| $\text{NO}_3^-$                     | Nitrate                      | $\text{mg L}^{-1}$    | 0.03                                | 0.38                | 2.93                             |
| $\text{SO}_4^{2-}$                  | Sulfate                      | $\text{mg L}^{-1}$    | 0.02                                | 1.34                | 0                                |
| <b>Cations</b>                      |                              |                       |                                     |                     |                                  |
| $\text{Na}^+$                       | Sodium                       | $\text{mg L}^{-1}$    | 0.01                                | 0                   | 0                                |
| $\text{K}^+$                        | Potassium                    | $\text{mg L}^{-1}$    | 0.02                                | 0                   | 0                                |
| $\text{Mg}^{2+}$                    | Magnesium                    | $\text{mg L}^{-1}$    | 0.02                                | 0                   | 0                                |
| $\text{Ca}^{2+}$                    | Calcium                      | $\text{mg L}^{-1}$    | 0.03                                | 0                   | 0                                |
| <b>Only groundwater</b>             |                              |                       |                                     |                     |                                  |
| $\text{Fe}^{2+}$                    | Iron(II)                     | $\text{mg L}^{-1}$    | 0.03                                | 0                   | 8.57                             |
| $\text{HCO}_3^-$                    | Hydrogen carbonate           | $\text{mmol L}^{-1}$  | 0.01                                | 6.43                | 0                                |

**Table S4.** Site-specific cumulated  $R^2$  of the reproduction of the interpoint distances of the data in the projection by the first four components of Isomap at sites with  $n > 15$ . Labels: P, Peege; Q, Quillow; S, Strom; St, Stierngraben; U, Ucker; D, Dauergraben; Gs, shallow groundwater; Gd, deep groundwater.

| ID    | Gd_203 | Gd_201 | Gd_198 | Gd_204 | Gs_199 | P_110 | P_108 | P_107 | Q_104 | Q_100 |
|-------|--------|--------|--------|--------|--------|-------|-------|-------|-------|-------|
| N     | 25     | 25     | 28     | 25     | 18     | 51    | 61    | 78    | 71    | 110   |
| Cp. 1 | 0.1    | 0.62   | 0.01   | 0.15   | 0.01   | 0.25  | 0.36  | 0.11  | 0.21  | 0.27  |
| Cp. 2 | 0.33   | 0.69   | 0.25   | 0.33   | 0.08   | 0.38  | 0.46  | 0.27  | 0.33  | 0.61  |
| Cp. 3 | 0.49   | 0.79   | 0.6    | 0.5    | 0.2    | 0.45  | 0.56  | 0.53  | 0.41  | 0.64  |
| Cp. 4 | 0.5    | 0.8    | 0.74   | 0.55   | 0.29   | 0.59  | 0.97  | 0.65  | 0.74  | 0.8   |

  

| ID    | Q_98 | Q_97 | Q_95 | Q_93 | S_121 | S_118 | St_133 | U_128 | D_112 |
|-------|------|------|------|------|-------|-------|--------|-------|-------|
| N     | 127  | 126  | 125  | 126  | 23    | 118   | 124    | 114   | 126   |
| Cp. 1 | 0.33 | 0.36 | 0.2  | 0.11 | 0.35  | 0.15  | 0.3    | 0.11  | 0.54  |
| Cp. 2 | 0.43 | 0.46 | 0.31 | 0.24 | 0.43  | 0.25  | 0.45   | 0.27  | 0.64  |
| Cp. 3 | 0.59 | 0.58 | 0.35 | 0.3  | 0.68  | 0.39  | 0.59   | 0.4   | 0.73  |
| Cp. 4 | 0.72 | 0.66 | 0.67 | 0.72 | 0.66  | 0.7   | 0.67   | 0.52  | 0.83  |

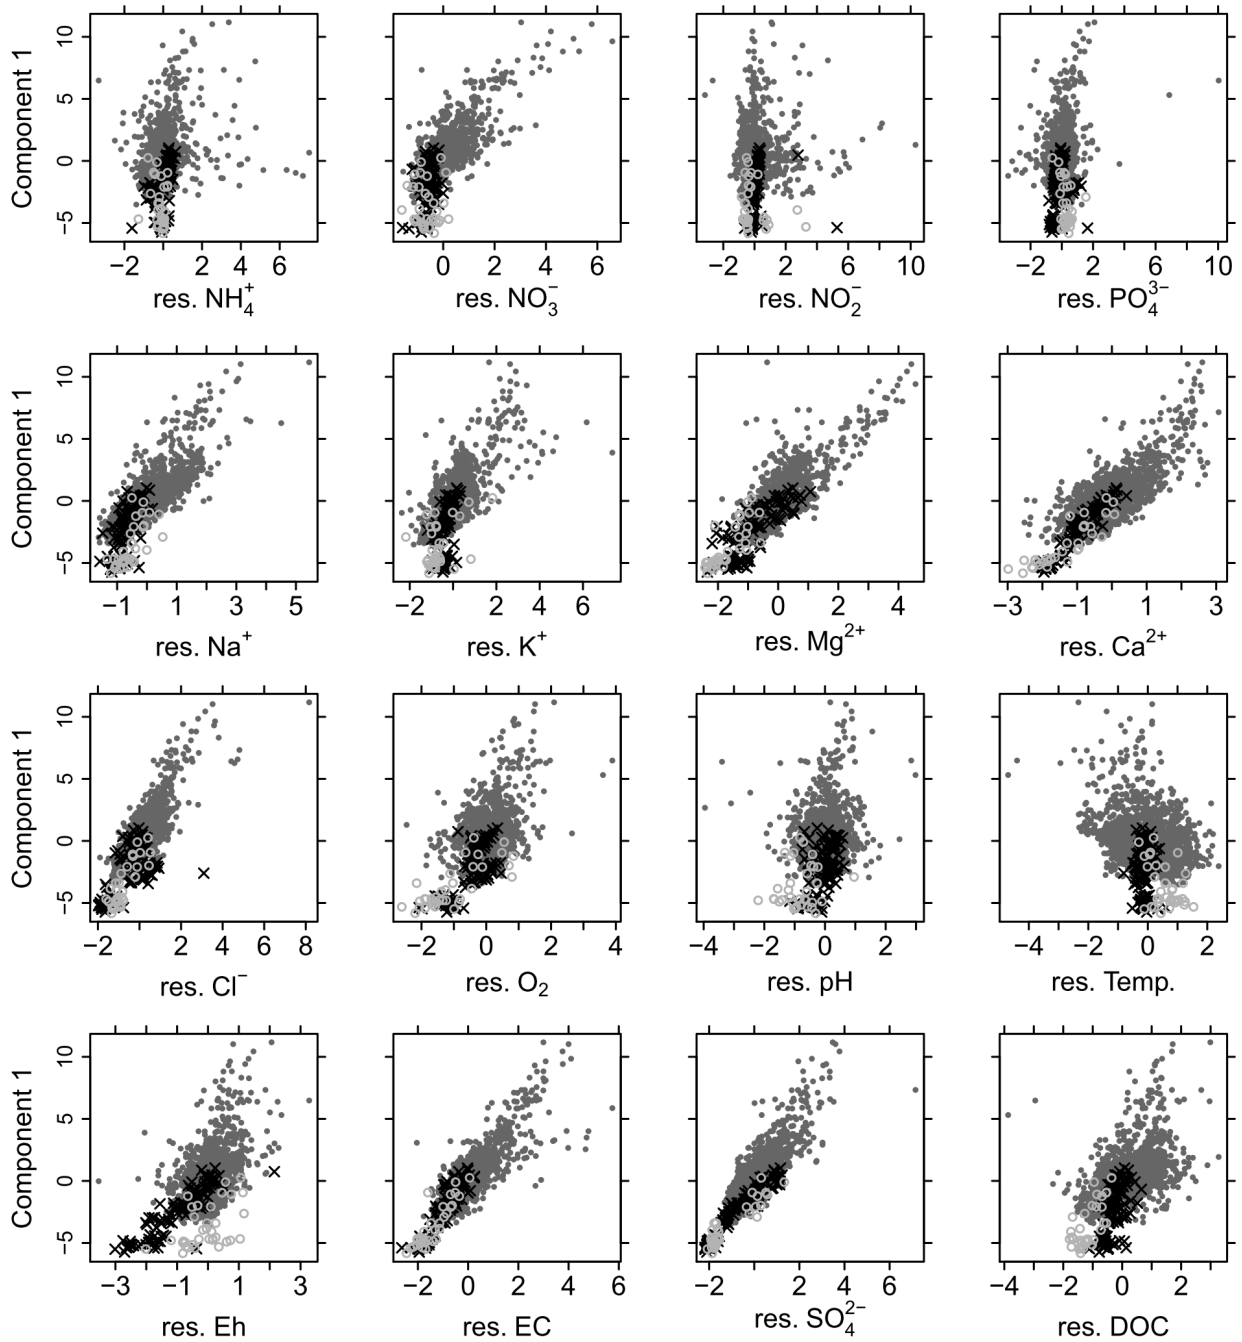

**Figure S1.** Residuals of the multiple linear regression of selected single variables and component 2-4 versus scores of component 1. Grey filled dots: stream water. Light grey open circles: shallow groundwater. Black x-mark: deep groundwater.

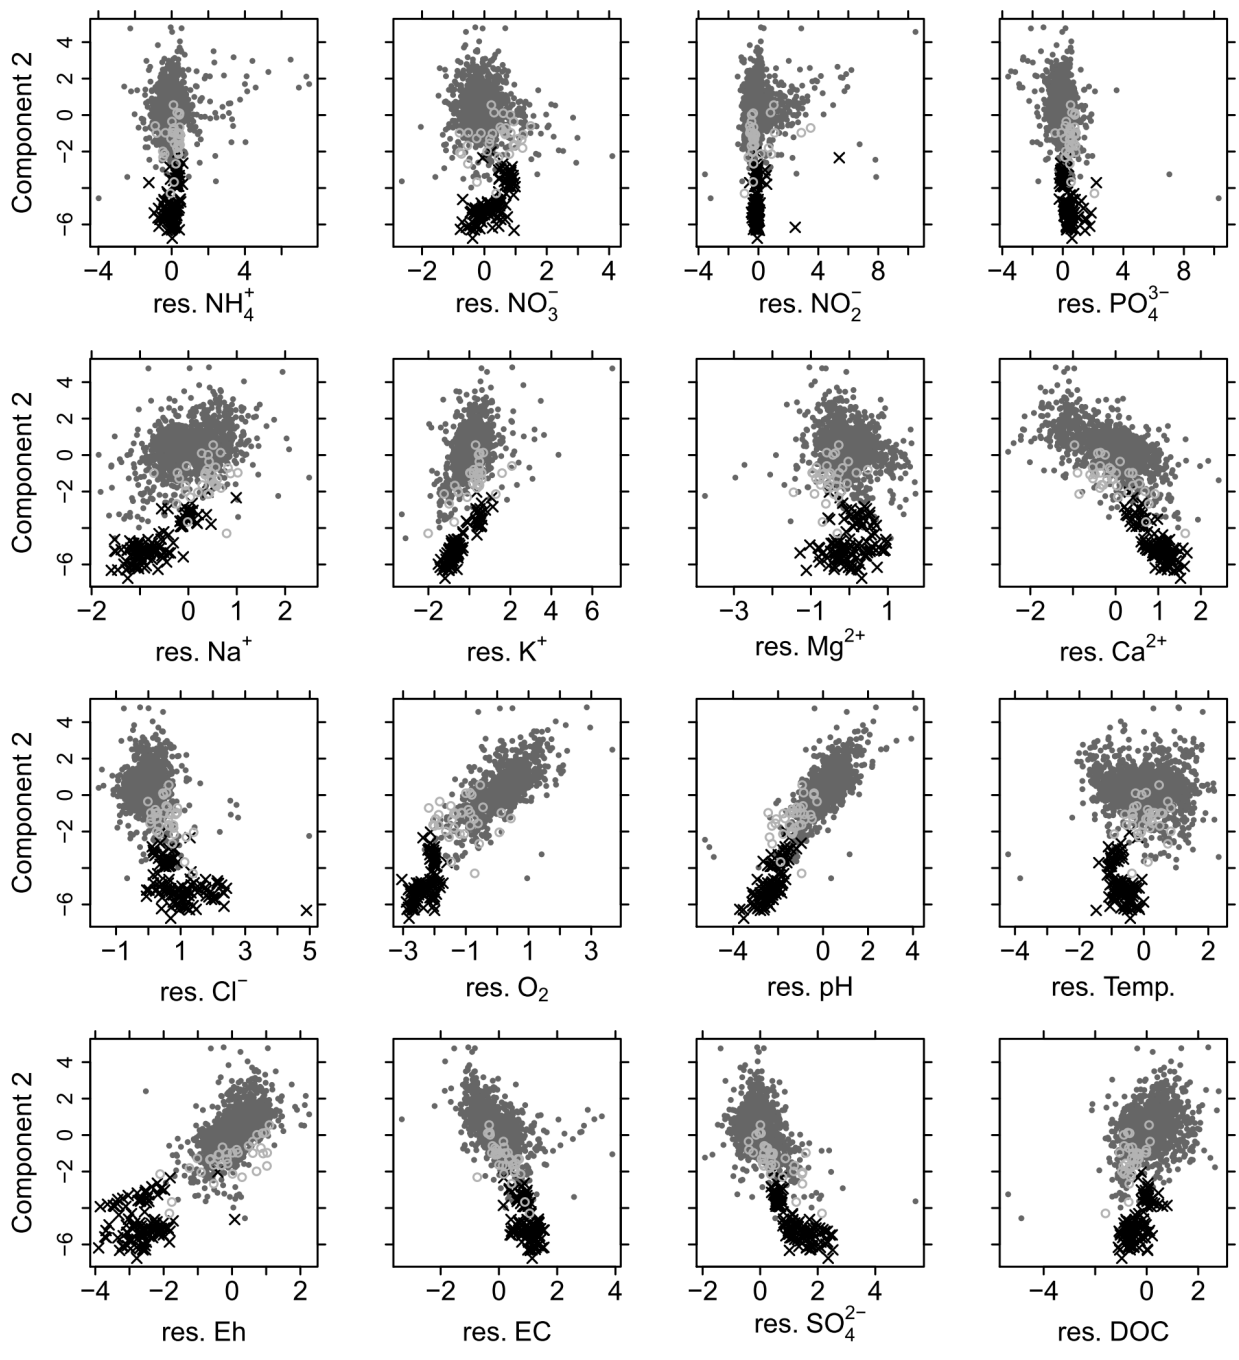

**Figure S2.** Residuals of the multiple linear regression of selected variables on component 1, 3 and 4 versus scores of component 2. Grey filled dots: stream water. Light grey open circles: shallow groundwater. Black x-mark: deep groundwater.

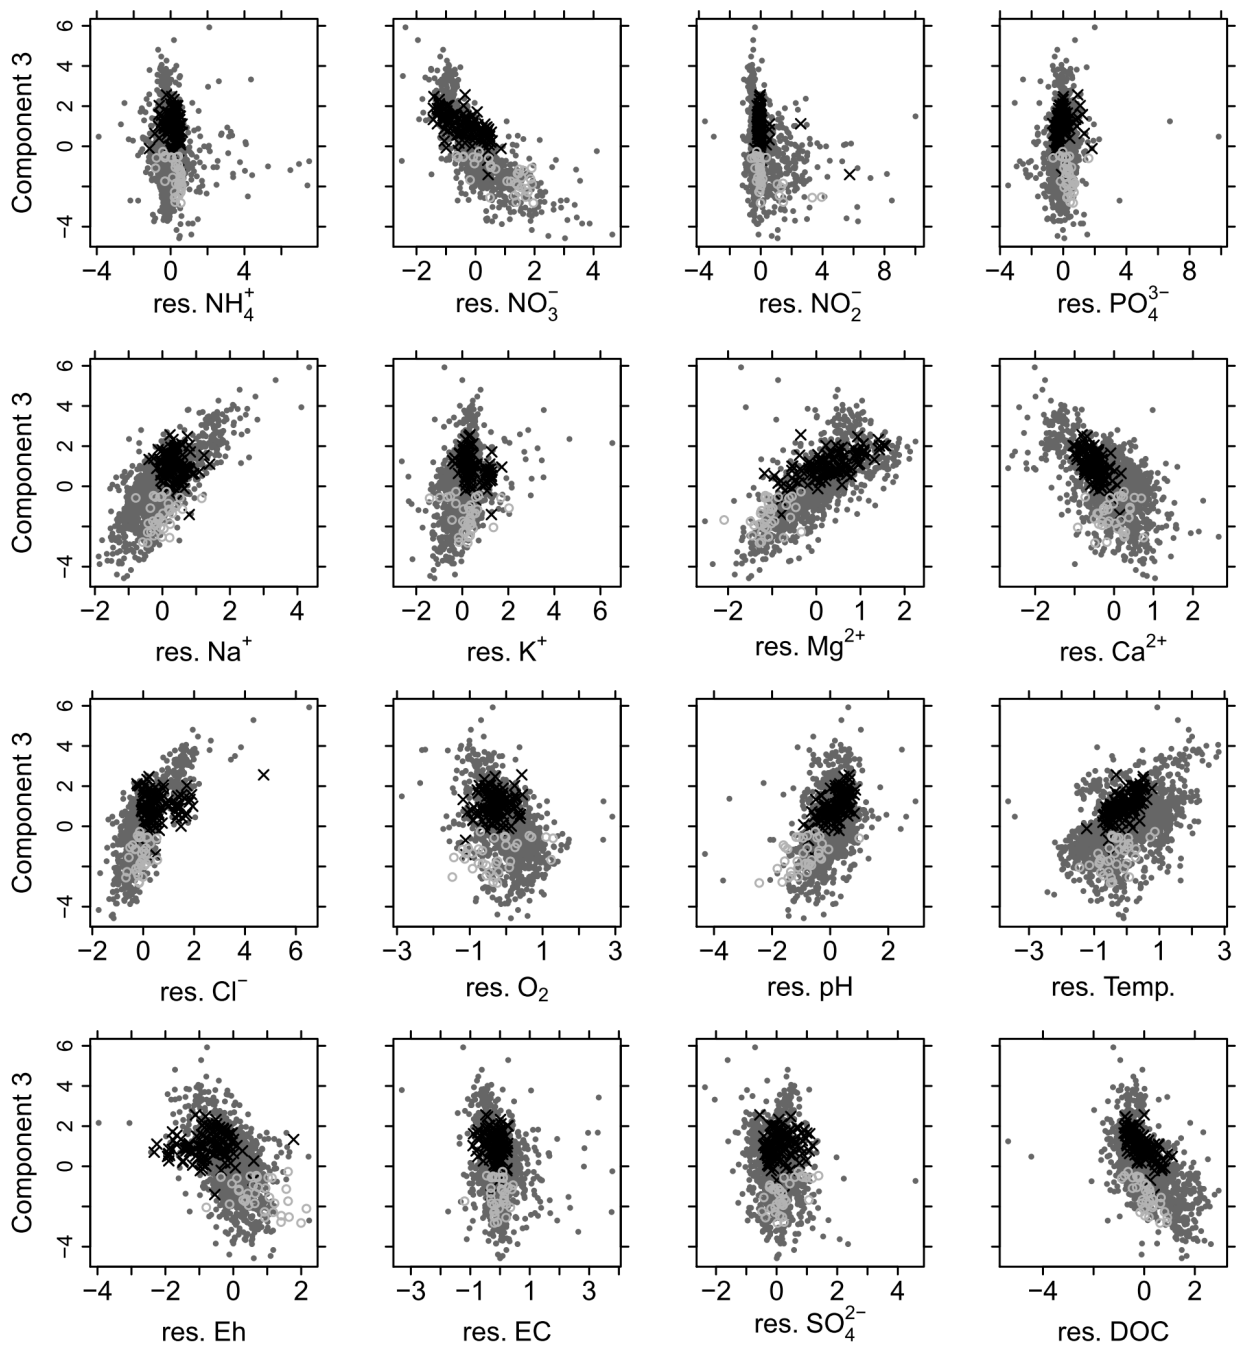

**Figure S3.** Selection of residuals of the multiple linear regression of single variables and component 1, 2 and 4 versus scores of component 3. Grey filled dots: stream water. Light grey open circles: shallow groundwater. Black x-mark: deep groundwater.



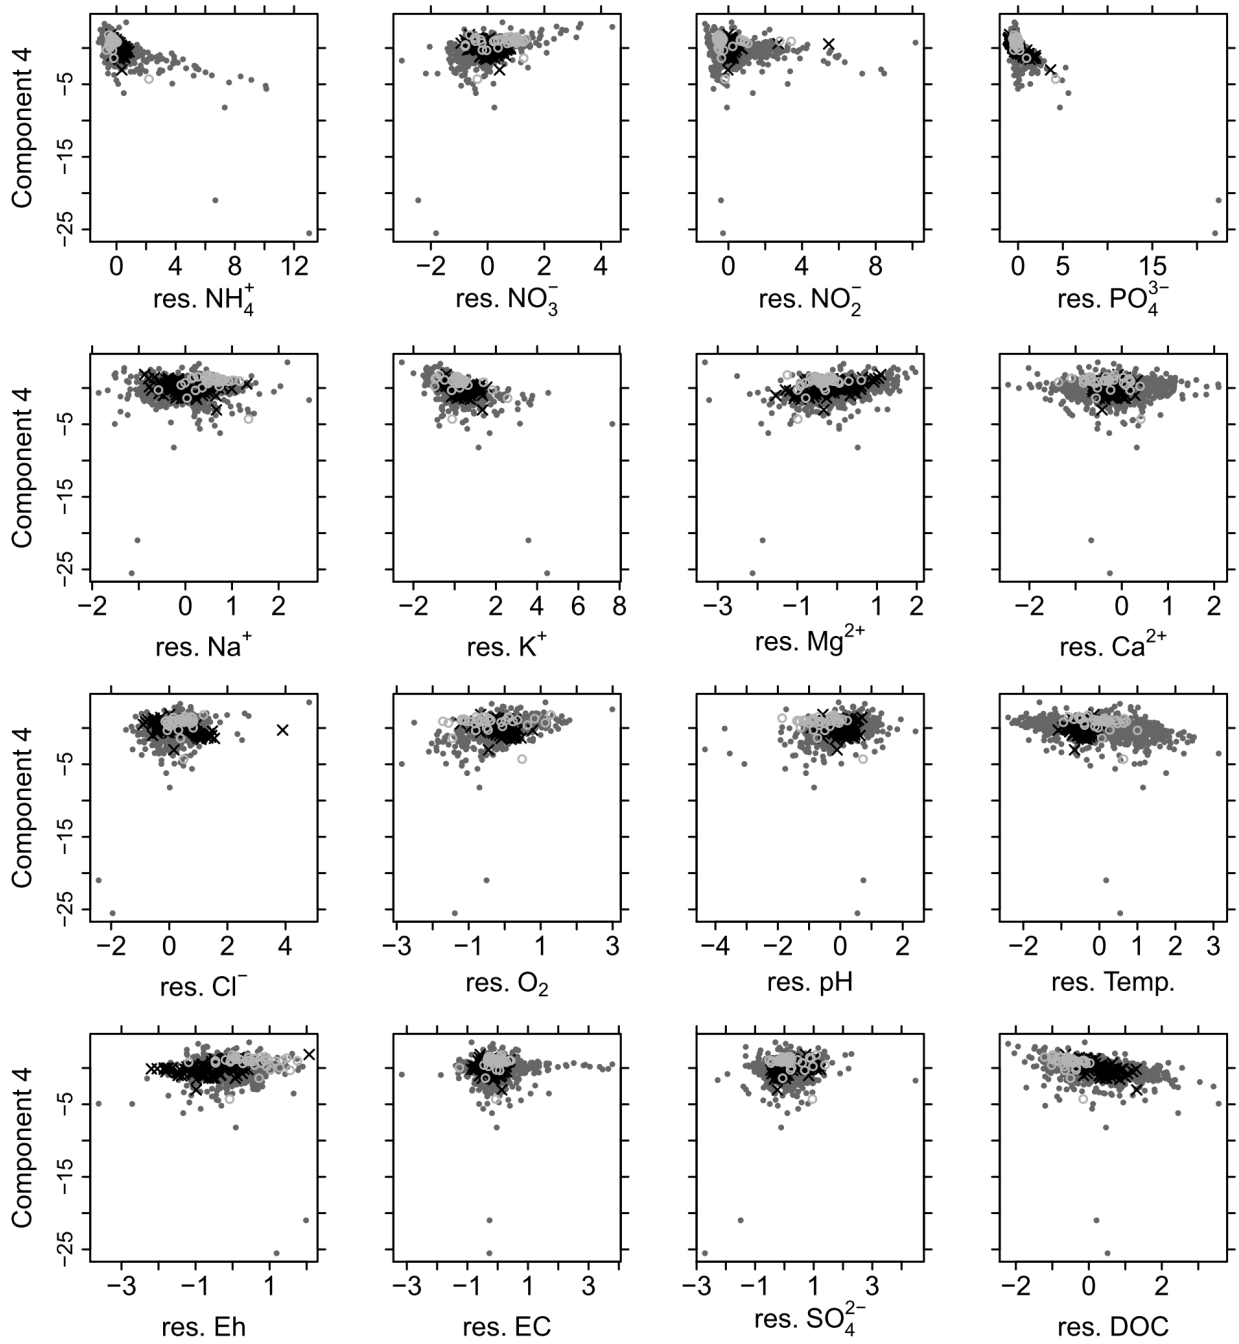

**Figure S4.** Selection of residuals of the multiple linear regression of single variables and component 1-3 versus scores of component 4. Grey filled dots: stream water. Light grey open circles: shallow groundwater. Black x-mark: deep groundwater.
